# Supplementary material
Source: Springer Nature journal article supplement (https://www.springermedizin.de/resource/supplementary/12986_2014_611_MOESM4_ESM.pdf/25655140)
Supplement: MOESM4 [file 25655140]

Enrollment

200 Assessed for eligibility

144 Excluded

90 Did not meet inclusion criteria

45 Unable to attend residential schedule

9 Failure to keep interview appointment

56 Randomized

Allocation

28 Randomized to **Ma-Pi 2 Diet**

11 Men, 17 Women

28 Randomized to **Control Diet**

14 Men, 14 Women

Follow-up

3 Discontinued intervention  
1 Reluctance to change diet  
2 Personal reasons2 Discontinued intervention  
2 Personal reasons

Analysis

**25 Included in any analysis for present report****26 Included in any analysis for present report**
